# Supplementary material for: Bronchoalveolar Lavage Fluid from COPD Patients Reveals More Compounds Associated with Disease than Matched Plasma
Source: PubMed Central journal article supplement (PMC6724137; doi:10.3390/metabo9080157), 2019-07-25
Supplement: metabolites-09-00157-s001.pdf [file metabolites-09-00157-s001.pdf]

# Supplemental

**Table S1.** SPIROMICs Cohort Characteristics.

|                                   | Never Smokers    | Smoking Controls | COPD              | p-value   |
|-----------------------------------|------------------|------------------|-------------------|-----------|
| n                                 | 196              | 929              | 1842              | 0         |
| Sex, % men                        | 38               | 48               | 57                | 5.28E-10  |
| Race, % (white,black,asian,other) | 69,22,2,6        | 68,27,1,5        | 81,15,1,2         | 5.00E-04  |
| Current smokers, %                | 0                | 51               | 35                | 1.54E-54  |
| Age, yr                           | 56 (50-64)       | 61 (52-68)       | 66 (59-71)        | 2.82E-67  |
| Pack-years                        | 0 (0-0)          | 37 (29-50)       | 46 (35-62)        | 1.49E-118 |
| Body mass index                   | 28.52 (4.96)     | 28.98 (5.07)     | 27.35 (5.31)      | 1.02E-11  |
| Bronchitis Attack, %              | 22 (42)          | 39 (49)          | 52 (50)           | 5.00E-04  |
| Chronic bronchitis, %             | 2 (14)           | 17 (38)          | 24 (43)           | 7.37E-18  |
| Exacerbations/yr                  | 0.04 (0.19)      | 0.22 (0.66)      | 0.55 (1.03)       | 5.00E-04  |
| Emphysema, %                      | 0.07 (0.03-0.23) | 0.11 (0.04-0.39) | 4.33 (0.82-14.19) | 1.20E-98  |
| FEV1 %                            | 101.78 (11.68)   | 97.16 (13.38)    | 60.98 (22.96)     | 0         |
| FEV1/FVC                          | 81 (77-84)       | 77 (73-81)       | 54 (41-63)        | 0         |

**Data are presented as median (interquartile range) or mean  $\pm$  SD;** Emphysema, %: % Emphysema voxels (< -950 Hounsfield units) in lung CT image; Bronchitis attack: At least one episode of bronchitis.; Exacerbations/yr: # of exacerbations in last year. ;Chronic bronchitis: Daily productive cough for at least 3 months in the previous 2 consecutive years.; % FEV1: Postbronchodilator % predicted forced expiratory volume in one Second; FEV1/FVC: Ratio of forced expiratory volume in one second to forced vital capacity.

**Table S2. Regression Design.**

| <b>Phenotype</b>   | <b>Regression</b> | <b>Covariates</b>                         |
|--------------------|-------------------|-------------------------------------------|
| % Emph             | beta              | Age, Sex,% FEV1, Smoker, Site, Race       |
| FEV1:% predicted   | linear            |                                           |
| FEV1/FVC           | beta              | Age, Sex, Asthma, Site, Race              |
| Chronic Bronchitis |                   | Age, Sex, Smoker, Site, Race, BMI, % FEV1 |
| Exacerbations      | Negative binomial | Sex, Race, % FEV1                         |
| Sex                | linear            | Site                                      |
| Age                | linear            | Site                                      |
| Smoker             | linear            | Site                                      |
| Menopause          | linear            | Site                                      |
| cntNeut            | linear            | Site                                      |
| cntLymph           | linear            | Site                                      |
| cntEos             | linear            | Site                                      |
| Hct                | linear            | Site                                      |
| Hgb                | linear            | Site                                      |
| BAL cntNeut        | linear            | Site                                      |
| BAL cntLymph       | linear            | Site                                      |
| BAL cntEos         | linear            | Site                                      |
| BAL cntMonocyte    | linear            | Site                                      |
| BAL cntMacrophage  | linear            | Site                                      |

Regressions listed in table were used for compounds with <20% missingness. Tobit regression was performed for all compounds with >20% missingness for all compounds Tobit regression covariates were the same as those listed above with the addition of batch.; % Emph:%; Emphysema voxels (< -950 Hounsfield units) in lung CT image ;FEV1 % predicted: Postbronchodilator % predicted forced expiratory volume in one Second; FEV1/FVC: Ratio of forced expiratory volume in one second to forced vital capacity.; Exacerbations: # of exacerbations in last year; Smoker: Current Smoker; BMI: Body mass index; cntNeut: Neutrophil Count in Plasma; cntLymph: Lymphocyte Count in Plasma; cntEos: Eosinophil Count in Plasma; Hct: % hematocrit from coulter counter (complete blood count).; Hgb: Hemoglobin from coulter counter (complete blood count); BAL cntNeut: Neutrophil Count in BAL; BAL cntLymph: Lymphocyte Count in BAL ;BAL cntEos: Eosinophil Count in BAL; BAL cntMonocyte: Monocyte Count in BAL ;BAL cntMacrophage: Macrophage Count in BAL

Table S3. Compound Types Searched.

| Compound Type       | Regular Expression                                                                                                                                                                                                                                                                                                                                                                                                                                                          |
|---------------------|-----------------------------------------------------------------------------------------------------------------------------------------------------------------------------------------------------------------------------------------------------------------------------------------------------------------------------------------------------------------------------------------------------------------------------------------------------------------------------|
| phospholipids'      | "^p[ascie]\\\"'                                                                                                                                                                                                                                                                                                                                                                                                                                                             |
| Phosphatidate       | ^pa\\\"'                                                                                                                                                                                                                                                                                                                                                                                                                                                                    |
| phosphocholine      | ^pc\\\"'                                                                                                                                                                                                                                                                                                                                                                                                                                                                    |
| phosphoethanolamine | ^pe\\\"'                                                                                                                                                                                                                                                                                                                                                                                                                                                                    |
| phosphatylserine    | ^ps\\\"'                                                                                                                                                                                                                                                                                                                                                                                                                                                                    |
| phosphoinositol     | ^pi\\\"'                                                                                                                                                                                                                                                                                                                                                                                                                                                                    |
| lysopes             | 'lysopc'                                                                                                                                                                                                                                                                                                                                                                                                                                                                    |
| lysopes             | 'lysopc'                                                                                                                                                                                                                                                                                                                                                                                                                                                                    |
| lysops              | 'lysop[ce]'                                                                                                                                                                                                                                                                                                                                                                                                                                                                 |
| carnitine           | 'carn'                                                                                                                                                                                                                                                                                                                                                                                                                                                                      |
| Amino acid          | ala  ala\$ alanine arg  arg\$ arginine asn  asn\$ asparagine asp  asp\$ aspartic cys  cys\$ cysteine gln  gln\$ glutamine glu  glu\$ glutamic glutamat gly  gly\$  glycine his  his\$ histidine ile  ile\$ isoleucine leu  leu\$ leucine lys  lys\$ lysine met  met\$ methionine phe  phe\$ phenylalanine pro  pro\$ proline ^pyl   pyl\$ pyrrolysine ser  ser\$ serine sec  sec\$ selenocysteine thr  thr\$ threonine trp tryptophan tyr  tyr\$ tyrosine val  val\$ valine |
| Fatty acid          | 'ic acid'                                                                                                                                                                                                                                                                                                                                                                                                                                                                   |
| Alanine             | "ala  ala\$ alanine",                                                                                                                                                                                                                                                                                                                                                                                                                                                       |
| Arginine            | "arg  arg\$ arginine",                                                                                                                                                                                                                                                                                                                                                                                                                                                      |
| Asparagine          | "asn  asn\$ asparagine",                                                                                                                                                                                                                                                                                                                                                                                                                                                    |
| Aspartic acid       | "asp  asp\$ aspartic",                                                                                                                                                                                                                                                                                                                                                                                                                                                      |
| Cysteine            | "cys  cys\$ cysteine",                                                                                                                                                                                                                                                                                                                                                                                                                                                      |
| Glutamine           | "gln  gln\$ glutamine",                                                                                                                                                                                                                                                                                                                                                                                                                                                     |
| Glutamic acid       | "glu  glu\$ glutamic glutamat",                                                                                                                                                                                                                                                                                                                                                                                                                                             |
| Glycine             | "gly  gly\$  glycine",                                                                                                                                                                                                                                                                                                                                                                                                                                                      |
| Histidine           | "his  his\$ histidine",                                                                                                                                                                                                                                                                                                                                                                                                                                                     |
| Isoleucine          | "ile  ile\$ isoleucine",                                                                                                                                                                                                                                                                                                                                                                                                                                                    |
| Leucine             | "leu  leu\$ leucine",                                                                                                                                                                                                                                                                                                                                                                                                                                                       |
| Lysine              | "lys  lys\$ lysine",                                                                                                                                                                                                                                                                                                                                                                                                                                                        |
| Methionine          | "met  met\$ methionine",                                                                                                                                                                                                                                                                                                                                                                                                                                                    |
| Phenylalanine       | "phe  phe\$ phenylalanine",                                                                                                                                                                                                                                                                                                                                                                                                                                                 |
| Proline             | "pro  pro\$ proline",                                                                                                                                                                                                                                                                                                                                                                                                                                                       |
| Pyrrolysine         | "^pyl   pyl\$ pyrrolysine",                                                                                                                                                                                                                                                                                                                                                                                                                                                 |
| Serine              | "ser  ser\$ serine",                                                                                                                                                                                                                                                                                                                                                                                                                                                        |
| Selenocysteine      | "sec  sec\$ selenocysteine",                                                                                                                                                                                                                                                                                                                                                                                                                                                |
| Threonine           | "thr  thr\$ threonine",                                                                                                                                                                                                                                                                                                                                                                                                                                                     |
| Tryptophan          | "trp tryptophan",                                                                                                                                                                                                                                                                                                                                                                                                                                                           |
| Tyrosine            | "tyr  tyr\$ tyrosine",                                                                                                                                                                                                                                                                                                                                                                                                                                                      |
| Valine              | "val  val\$ valine"                                                                                                                                                                                                                                                                                                                                                                                                                                                         |

**Table S4.** Institutional Review Board Approval Documentation for SPIROMICS.

| <b>Participating Center</b>                 | <b>Institution Title for Review Board</b>                                            | <b>Protocol Number</b>    |
|---------------------------------------------|--------------------------------------------------------------------------------------|---------------------------|
| <b>SPIROMICS</b>                            |                                                                                      |                           |
| Columbia University Medical Center          | Columbia University Medical Center IRB                                               | IRB-AAAE9315              |
| Johns Hopkins University                    | Johns Hopkins Medicine Institutional Review Boards (JHM IRB)                         | NA 00035701 / CIR00004922 |
| National Jewish Health                      | National Jewish IRB                                                                  | HS-2678                   |
| Temple University                           | Temple University Office for Human Subjects Protections Institutional Review Board   | 21416                     |
| University of Alabama at Birmingham         | The University of Alabama at Birmingham Institutional Review Board for Human Use     | F120906004                |
| University of California, Los Angeles       | UCLA Office of the Human Research Protection Program                                 | 10-001740-CR-00004        |
| University of California, San Francisco     | UCSF Human Research Protection Program, Committee on Human Research                  | 10-03169                  |
| University of Illinois at Chicago           | UIC Office for the Protection of Research Subjects (OPRS)                            | 2013-0939                 |
| University of Iowa                          | The University of Iowa Human Subjects Office/Institutional Review Board (IRB)        | 201308719                 |
| University of Michigan                      | Medical School Institutional Review Board (IRBMED)                                   | HUM00036346               |
| University of North Carolina at Chapel Hill | UNC-CH Office of Human Research Ethics (OHRE) Non-Biomedical IRB                     | 10-0048                   |
| University of Utah                          | The University of Utah Institutional Review Board                                    | 00027298                  |
| Wake Forest University                      | Wake Forest University Health Sciences Office of Research Institutional Review Board | IRB00012805               |

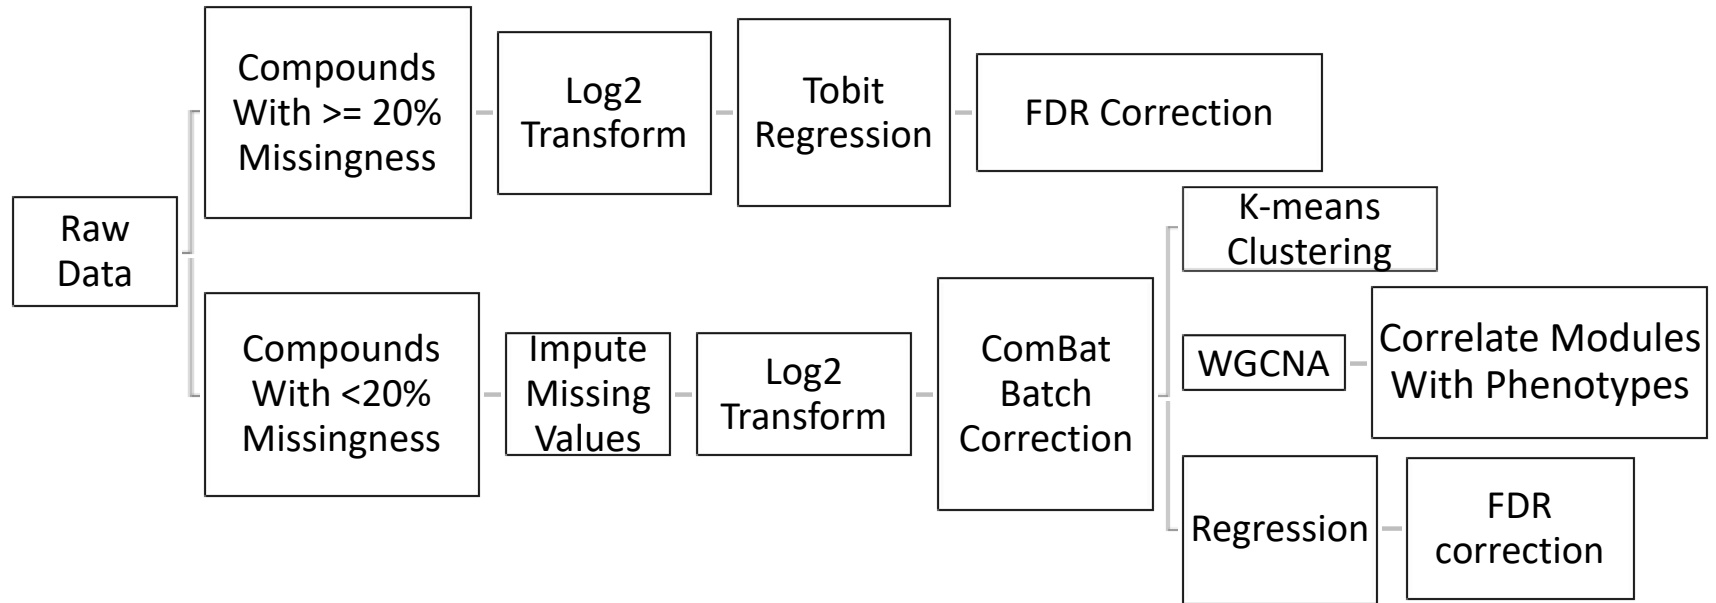

Figure S1. Analysis Procedure.

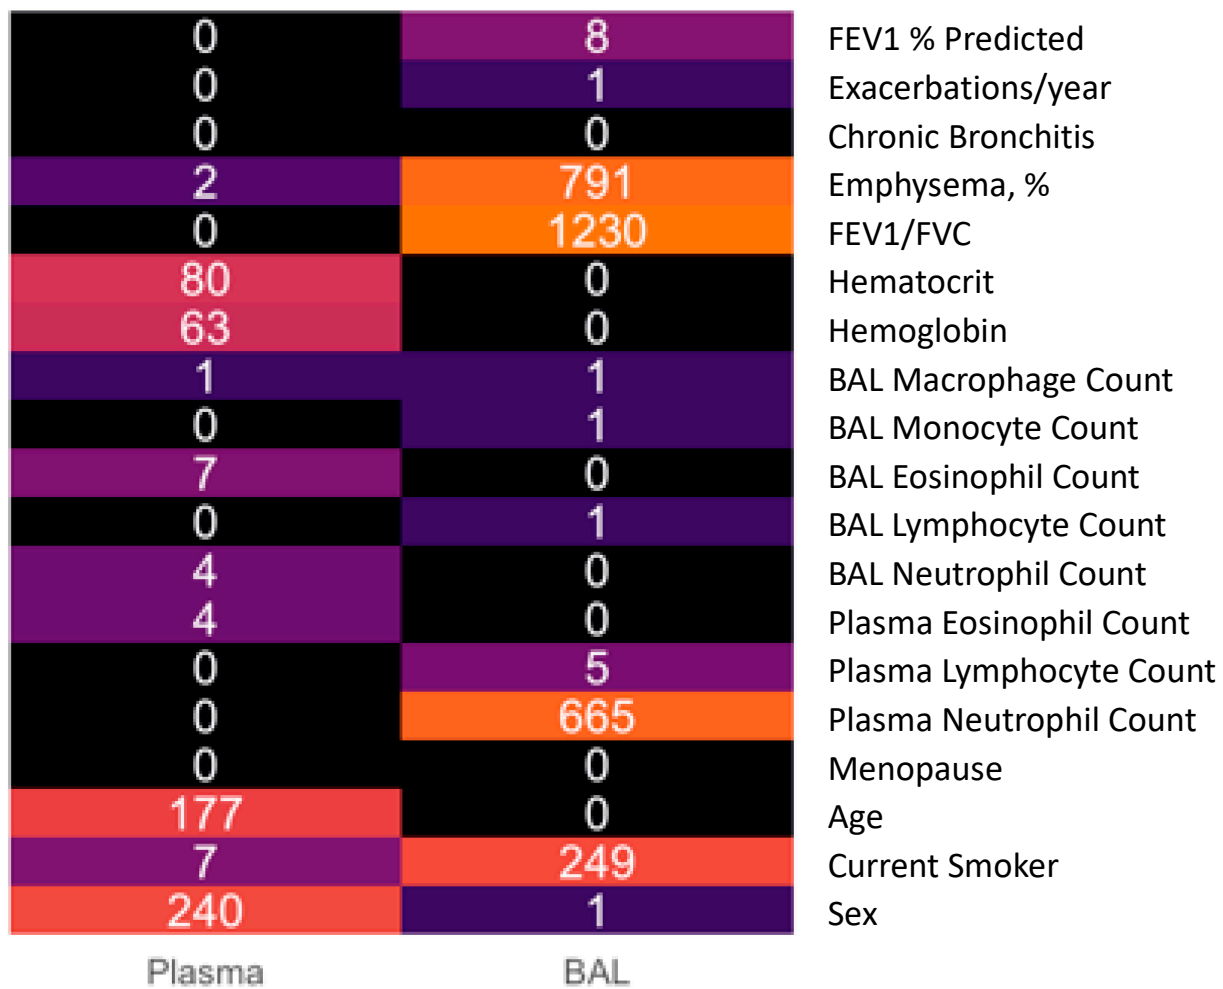

Figure S2. Heatmap of Associations Between Compounds and Phenotypes.

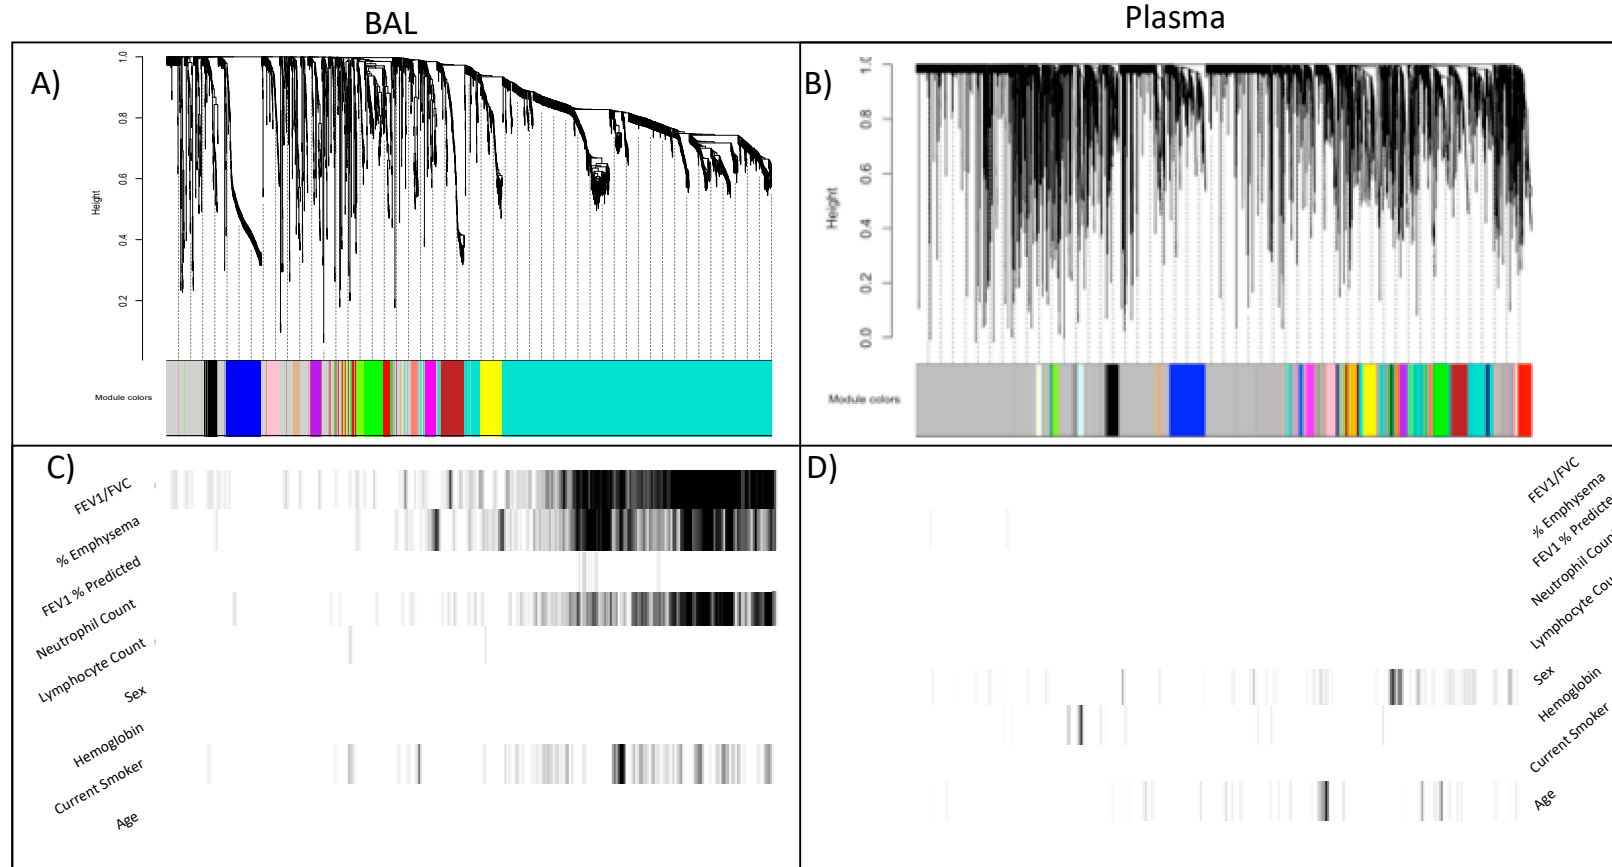

**Figure S3.** Significant Compounds in Correspondence with WGCNA Modules (A)WGCNA Derived BAL compound modules, colors correspond to modules compiled by WGCNA, dendrograms were created using average linkage hierarchical clustering on a dissimilarity matrix within the WGCNA software package (B) WGCNA Derived plasma compound modules. (C) BAL compounds individually associated with selected COPD sub-phenotypes, cell counts, and clinical variables. Order matches position of compounds in WGCNA module in A. (D) Plasma compounds individually associated with selected COPD sub-phenotypes, cell counts, and clinical variables. Order matches position of compounds in WGCNA module in B.

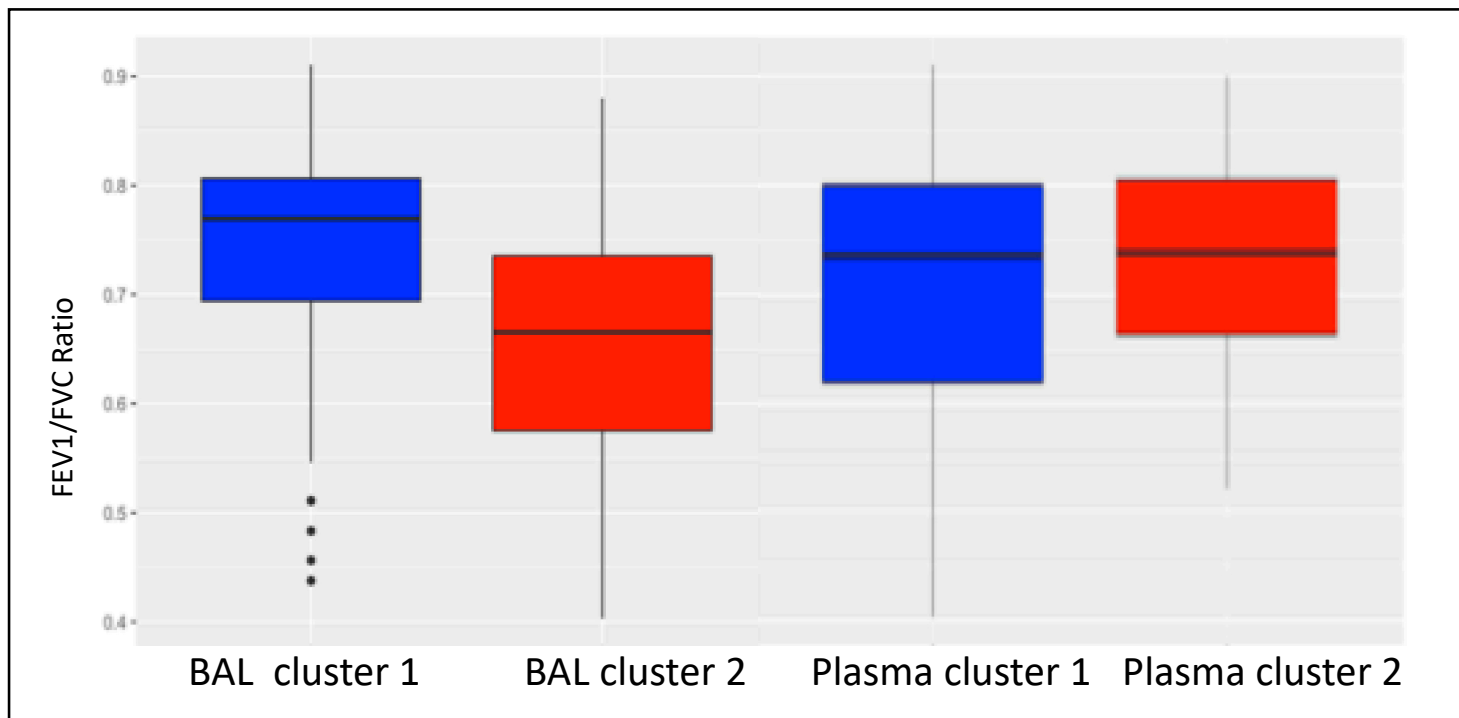

**Figure S4.** K-means Clustering of Subjects Based on Compound Profiles.

K-means clustering of subjects based upon compound profiles, demonstrating distribution of FEV1/FVC within each of the two clusters for both BAL and plasma.



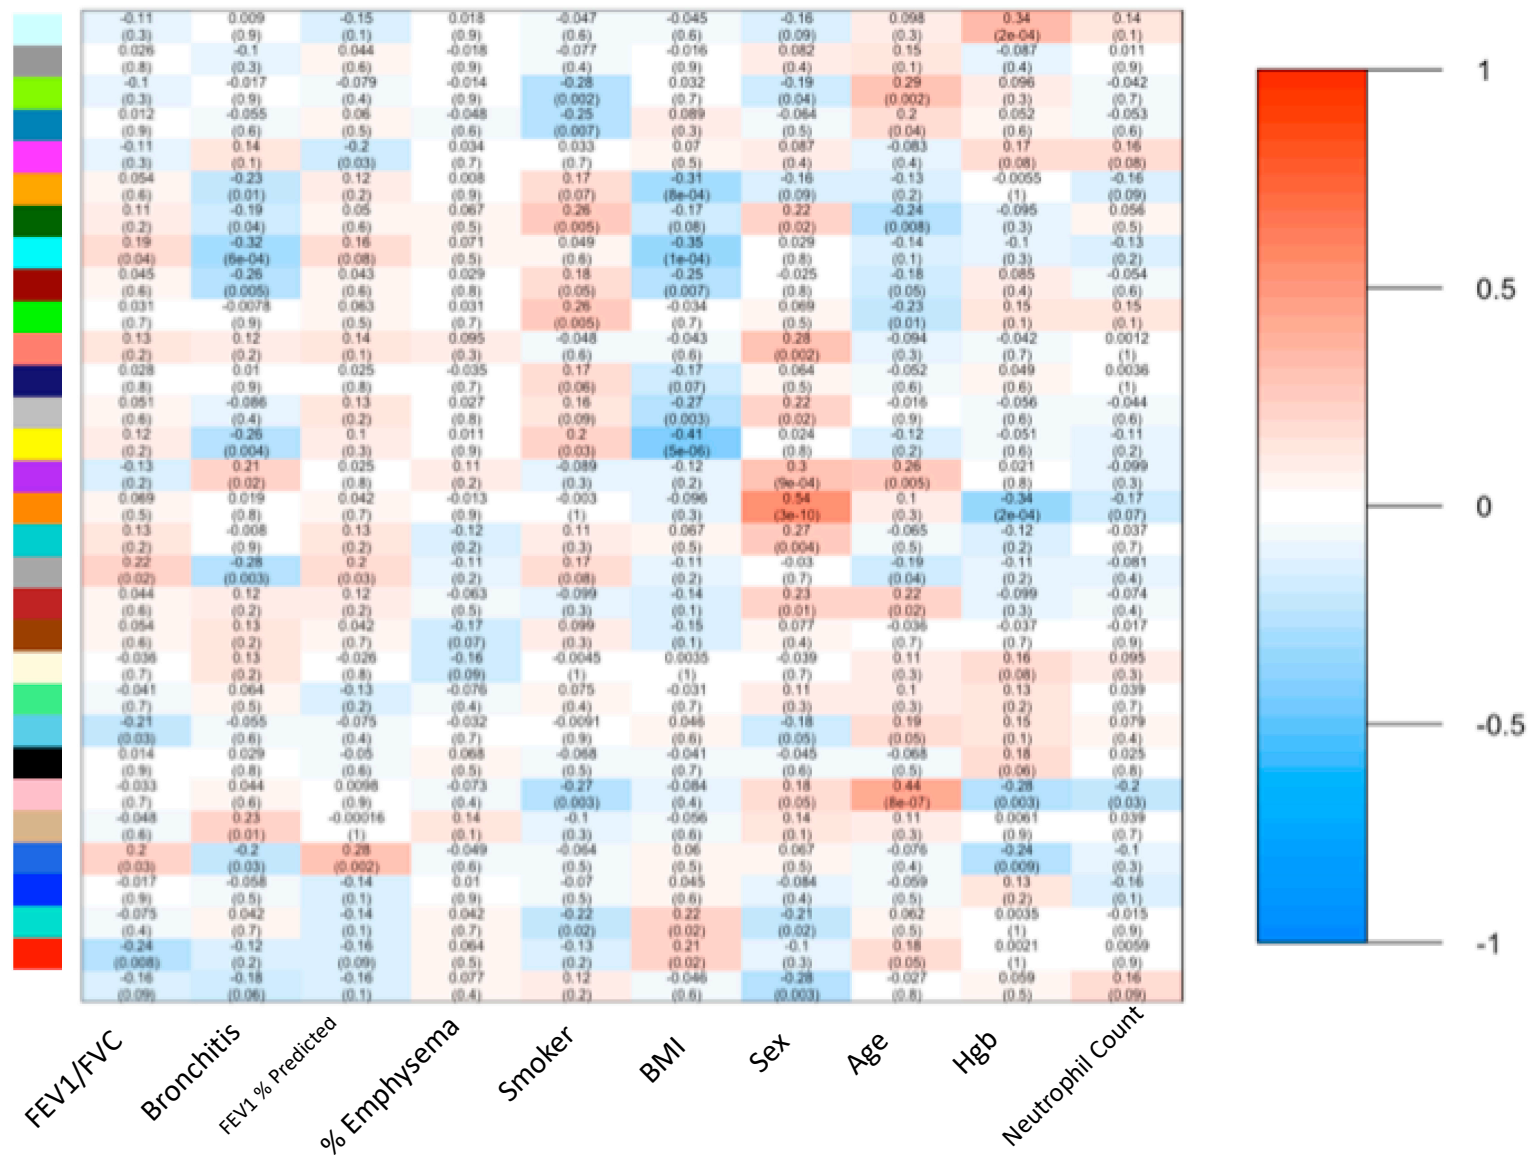

Figure S5. Full WGCNA Module Eigenvalue to Phenotype. Relationship in Plasma.

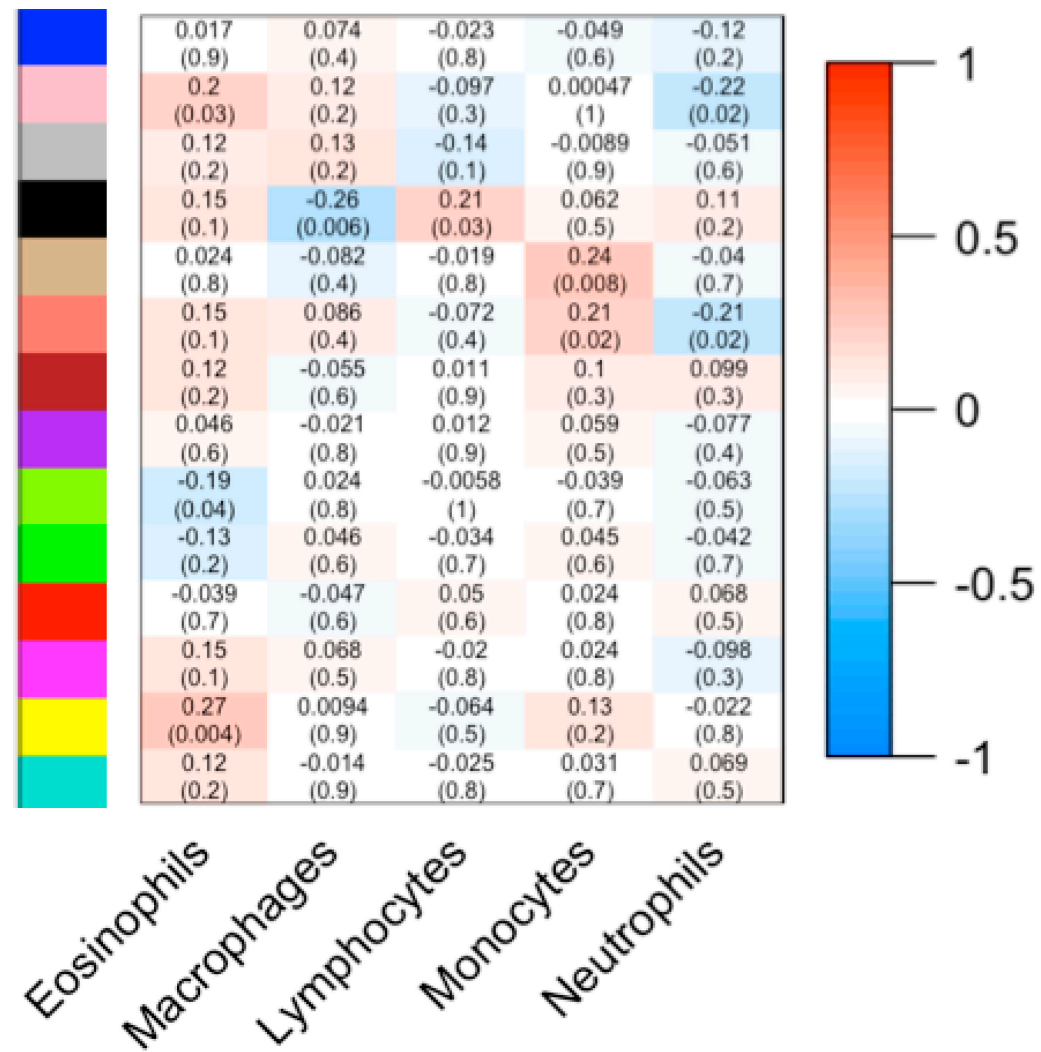

**Figure S6.** WGCNA Module Eigenvalue to Phenotype Relationship in BAL for BAL Cell Counts.
